# Supplementary material for: Pneumocystis jirovecii pneumonia (PCP) PCR-negative conversion predicts prognosis of HIV-negative patients with PCP and acute respiratory failure
Source: PLoS One. 2018 Oct 25;13(10):e0206231. doi: 10.1371/journal.pone.0206231 (PMC6201940; doi:10.1371/journal.pone.0206231)
Supplement: S1 Dataset — (XLSX) [file pone.0206231.s001.xlsx]

## Sheet: Sheet1
NO.	Age	SEX	SHOCK	MV	High O2	CRRT	P/FRATIO	smoking(1:eversmoker, 0: nonsmoker)	PYRS	HTN	DM	Chronic Liver Disease	CVD	CHF	CKD	COPD	Solid malignancy	Hematologic malignancy	Solid organ transplantation	Rhematologic disease	Other	SOURCE	CMVqPCR	APATCHEII	IMMUNOCOM	STEROIDUSE	SURVIVAL	PCP PCR NC	DURATION	2NDTREAT	1STDURATION	EF	RWMA	PROCALCITONIN	CRP
1	80	MALE	Y	Y	N	Y	232.5	0		Y	Y	N	N	N	N	N	N	N	N	N	Y	E	0	17	N	N	S	Y	14	N		51	Y	36.47	255.58
2	47	MALE	Y	Y	N	N	190.2	1	10	N	Y	Y	N	Y	Y	N	N	N	Y	N	N	E	0	18	Y	Y	D	Y	15	N		58	N	72.17	51.49
3	59	MALE	Y	Y	N	Y	145	0		N	N	N	N	N	Y	N	N	N	N	N	Y	BO	0	27	N	N	D	Y	25	N		61	N	114.45	254.81
4	66	FEMALE	N	Y	N	Y	450	0		N	Y	N	N	N	N	N	N	Y	N	N	N	B	0	27	N	N	D			N		63	N	0.28	61.24
5	54	MALE	N	Y	N	N	241.5	1	30	N	N	N	N	N	N	N	Y	N	N	N	N	E	0	23	N	N	D	Y	5	Y	5	78	N	4.48	74.57
6	52	FEMALE	N	Y	N	Y	177.4	0		Y	N	N	N	N	Y	N	N	N	Y	N	N	E	0	19	Y	Y	S	Y	24	N		57	Y	0.13	38.66
7	38	MALE	N	N	N	N		1	30	N	N	N	N	N	N	N	N	N	N	N	Y	B	0	8	N	N	S	Y	6	N		61	N	17.77	422.63
8	35	MALE	N	Y	N	Y	142	0		N	N	N	N	N	Y	N	N	N	Y	N	N	E	1	21	Y	Y	D	N		Y	20	77	N	4.59	185.05
9	74	MALE	Y	Y	N	N	286.9	1	50	Y	N	N	Y	N	Y	N	Y	N	N	N	N	BO	0	21	N	N	S	Y	12	N			N	2.39	266.53
10	69	MALE	N	Y	N	N	317.5	1	82.5	Y	N	N	N	N	N	N	Y	N	N	N	N	E	0	24	N	N	S	Y	8	N		58	Y	6.11	78.95
11	43	FEMALE	Y	Y	N	Y	358	0		N	N	N	N	N	N	N	N	Y	N	N	N	E	0	21	N	N	D	Y	7	N		68	N	1.86	18.9
12	67	MALE	Y	Y	N	N	205.7	0		Y	N	N	N	N	N	N	Y	N	N	N	N	E	0	20	N	N	D	Y	7	N		36	N	13.18	288.09
13	49	FEMALE	Y	Y	N	Y	114	0		Y	Y	N	N	N	N	N	N	Y	N	N	N	E	0	25	N	N	D	Y	16	N		68	N	25.49	234.91
14	67	MALE	N	Y	N	N	323	1	40	N	N	N	N	N	N	N	Y	N	N	N	N	BO	0	24	N	Y	S	Y	8	N		71	N	0.61	201.62
15	81	MALE	Y	Y	N	Y	114.4	0		Y	Y	N	N	Y	Y	Y	Y	N	N	N	N	E	1	18	N	Y	D	Y	9	N		42	Y	1.15	16.85
16	67	MALE	N	Y	N	N	253.3	1	40	N	N	N	N	N	N	N	Y	N	N	N	N	BO	0	19	N	N	D	Y	12	Y	19	71	N	0.73	274.42
17	72	MALE	Y	Y	N	N	189.8	1	40	N	N	N	N	N	N	N	Y	N	N	N	N	E	0	20	N	N	S	Y	8	N		74	N	1.13	155.52
18	75	MALE	Y	Y	N	Y	141.7	1	25	Y	N	N	N	N	N	N	Y	N	N	N	N	E	1	26	N	N	D	N		N		64	N		168.38
19	70	FEMALE	Y	Y	N	N	146.6	0		N	N	N	N	N	N	N	Y	N	N	N	N	BO	1	25	N	N	D	N		N		67	N	0.93	47.6
20	53	FEMALE	Y	Y	N	Y	127.7	0		N	Y	N	N	N	N	N	N	Y	N	N	N	E	1	19	Y	Y	D	N		N		77	N	0.32	46.89
21	63	FEMALE	N	Y	N	Y	183.8	0		Y	Y	N	N	N	Y	N	N	N	Y	N	N	E	1	20	Y	Y	D			N		60	N	1.59	81.93
22	43	MALE	N	Y	N	Y	196.4	1	23	Y	N	N	N	N	Y	N	N	N	Y	N	N	BO	1	15	Y	Y	D	N		Y	20	75	N	3.35	157.31
23	67	MALE	N	Y	N	Y	206.2	1	15	Y	Y	N	N	N	N	N	N	Y	N	N	N	E	0	21	N	N	D	Y	6	N		76	Y	5.83	56.44
24	56	FEMALE	N	Y	N	N	279	0		N	N	N	N	N	N	N	Y	N	N	N	N	E	1	29	N	N	D	N		N				0.63	81.11
25	69	MALE	N	Y	N	Y	200.8	1	45	Y	N	N	N	N	N	N	N	N	N	N	Y	BO	1	31	N	N	D	N		N		62	N	8.65	277.36
26	71	FEMALE	Y	Y	N	N	139.3	0		N	Y	N	N	N	N	N	N	Y	N	N	N	E	1	23	N	Y	D	Y	13	Y	13	52	Y	5.87	271.7
27	44	MALE	N	Y	N	N	221.6	1	25	Y	N	N	N	N	Y	N	N	N	Y	N	N	E	1	13	Y	N	S	Y	19	N		64	N	0.31	295.26
28	73	FEMALE	N	Y	N	Y	196.3	0		Y	N	N	N	N	Y	N	N	N	N	Y	N	E	1	10	N	N	D	Y	16	Y	24	67	N	0.19	207.9
29	71	FEMALE	N	Y	N	N	245	0		Y	Y	N	N	N	Y	N	N	N	N	Y	N	BO	1	12	N	Y	S	Y	11	Y	8	66	N	0.1	114
30	55	MALE	N	Y	N	N	239.3	1	60	Y	N	N	N	N	N	N	Y	N	N	N	N	BO	0	18	N	N	D	Y	5	N		64	N	0.74	249.6
31	54	MALE	N	Y	N	Y	181.5	1	30	Y	N	N	N	N	Y	N	N	N	Y	N	N	E	1	26	Y	Y	D	Y	23	Y	8	74	N	4	116.4
32	66	FEMALE	Y	Y	N	N	194.2	0		Y	N	N	N	N	N	N	N	N	N	Y	N	E	1	16	Y	Y	S	Y	10	N		70	N	3.32	122.8
33	47	FEMALE	N	Y	N	N	231	0		N	N	N	N	N	N	N	Y	N	N	N	N	BO	1	18	N	N	D	Y	28	Y	9	67	N	0.6	259
34	62	MALE	N	Y	N	Y	239.4	1	32	Y	Y	N	Y	N	Y	N	Y	N	N	N	N	E	0	29	N	N	D	N		N		68	N	0.65	50.1
35	44	MALE	N	Y	N	Y	303.8	1	12.5	N	N	N	N	N	N	N	N	N	N	N	Y	E	1	17	Y	N	S	Y	10	N		30	Y	73.38	81
36	48	MALE	N	Y	N	Y	305.3	0		Y	N	Y	N	N	N	N	N	N	N	N	Y	BO	0	16	N	N	D	Y		N		71	N	0.17	9.8
37	50	MALE	N	N	Y	N		0		Y	N	N	N	N	N	N	N	Y	N	N	N	S	1	13	N	N	S	Y	12	N		47	Y	0.94	280.1
38	76	MALE	N	Y	N	N	140.8	0		Y	Y	N	N	N	N	N	N	N	N	N	Y	E	1	20	N	N	D	Y	6	N		76	N	1.2	236.6
39	69	FEMALE	Y	Y	N	N	299	0		N	N	N	N	N	N	N	Y	N	N	N	N	E	0	15	N	N	S	Y	11	N		61	N	0.67	60.7
40	41	MALE	Y	Y	N	N	177.5	1	10	N	N	N	N	N	N	N	Y	N	N	N	N	B	0	14	N	N	D	Y	6	N		71	N	0.19	22.5
41	67	MALE	Y	Y	N	N	243.3	0		N	N	N	N	N	N	N	Y	N	N	N	N	E	0	13	N	N	D	Y	8	N		66	N	0.54	108.2
42	52	FEMALE	Y	Y	N	N	375.7	0		N	N	N	N	N	N	N	N	N	N	Y	N	E	0	18	N	Y	S	Y	6	N		27	Y	0.84	245.2
43	69	MALE	N	Y	N	N	204.8	1	12	N	N	N	N	N	N	N	Y	N	N	N	N	BO	1	26	N	N	S	Y	8	N		55	N	0.84	174.2
44	48	MALE	Y	Y	N	Y	148.9	1	30	Y	N	N	N	N	N	N	N	Y	N	N	N	E	0	23	N	Y	D	Y	6	N		70	N	2.42	214.8
45	75	MALE	N	Y	N	Y	108.6	0		Y	N	N	Y	N	N	N	Y	N	N	N	N	E	1	33	N	N	D	N		Y	14	62	N	0.19	179.1
46	72	MALE	Y	Y	N	Y	170	0		Y	N	N	N	N	N	N	N	Y	N	N	N	E	1	30	N	N	D	N		N		75	N	5.68	113.2
47	38	MALE	N	Y	N	N	312.5	0		N	N	N	N	N	N	N	N	N	N	N	Y	B	0	16	N	N	S	Y	8	N		61	N	0.3	77.1
48	58	MALE	N	Y	N	N	218.8	1	14	Y	Y	Y	N	N	N	N	Y	N	N	N	N	E	1	14	N	N	D	Y	10	N		52	N	2.39	123.8
49	72	MALE	N	Y	N	Y	90.1	1	144	Y	N	N	N	Y	N	N	Y	N	N	N	N	E	1	24	N	N	D	N		N		61	N	2.42	87.2
50	72	FEMALE	Y	Y	N	N	342.6	0		Y	Y	N	N	N	N	N	N	Y	N	N	N	E	1	18	N	N	S	Y	15	N		60	N		134.2
51	60	FEMALE	Y	Y	N	N	105.3	0		N	N	Y	N	N	N	N	Y	N	N	N	N	E	1	14	N	Y	D	Y	8	N		69	N	0.54	72.3
52	62	MALE	Y	Y	N	Y	107.8	0		Y	N	N	N	Y	Y	N	N	N	N	N	Y	E	0	25	N	N	D	Y	9	N		40	Y	5.63	138.4
53	37	MALE	Y	Y	N	N	402.3	0		Y	Y	N	N	N	Y	N	N	N	Y	N	N	BO	1	20	Y	Y	S	Y	22	Y	14	65	N	9.77	88.7
54	57	MALE	N	Y	N	N	109.5	1	30	N	N	N	N	N	N	N	N	Y	N	N	N	E	0	14	N	N	D	Y	20	N		58	N	2.68	210
55	55	FEMALE	Y	Y	N	N	200.6	0		Y	N	N	N	N	N	N	N	N	Y	N	N	E	0	11	Y	Y	S	Y	7	N		45	Y	28.56	464.8
56	79	FEMALE	Y	Y	N	Y	166.9	0		N	N	N	N	N	N	N	N	N	N	Y	N	E	1	25	Y	N	D	Y	4	N		69	N	0.14	45.1
57	33	FEMALE	N	Y	N	Y	199.6	0		Y	N	N	N	N	Y	N	N	N	Y	N	N	BO	0	14	Y	Y	S	Y	10	N		60	N	0.34	67.9
58	44	MALE	Y	Y	N	N	211.3	1	알수없음	N	N	N	N	N	N	N	N	Y	N	N	N	E	1	21	N	N	D	Y	12	N		43	Y	1.09	221.2
59	71	MALE	Y	Y	N	N	135.7	1	30	N	N	N	N	N	N	N	Y	N	N	N	N	E	0	16	N	Y	D	Y	7	Y	8	25	Y	1.66	133.6
60	50	FEMALE	Y	Y	N	Y	94.4	0		Y	N	N	N	N	Y	N	Y	N	N	N	N	E	0	20	N	N	D	Y	13	N		53	Y	0.23	64.4
61	40	FEMALE	Y	Y	N	N	370.3	0		N	N	N	N	N	N	N	N	N	N	Y	N	BO	0	12	N	N	S	N		N		68	N	0.17	70.4
62	62	MALE	Y	Y	N	Y	327.8	0		Y	Y	N	N	N	Y	N	N	N	Y	N	N	E	0	29	Y	Y	S	Y	14	N		62	N	0.37	194.4
63	75	FEMALE	N	N	Y	N		0		Y	Y	N	N	N	Y	N	N	N	N	Y	N	S	0	14	Y	Y	S	Y	10	N		64	N	1.11	111.1
64	72	MALE	Y	N	Y	N		1	40	Y	Y	N	N	N	N	N	N	N	N	N	Y	S	1	19	N	N	S	Y	7	N		76	N	0.1	75.3
65	69	FEMALE	Y	Y	N	Y	287.8	1	25	Y	Y	Y	N	N	Y	N	N	N	Y	N	N	B	1	39	Y	Y	D	Y	6	N		67	N	2.03	40.3
66	75	MALE	Y	Y	N	N	155.4	1	50	N	N	N	N	N	N	Y	N	N	N	N	Y	E	1	26	N	N	D	N		N		77	N	1.51	284.3
67	44	FEMALE	N	Y	N	N	195.4	1	10	N	N	Y	N	N	N	N	N	N	N	N	Y	E	0	16	N	N	S	Y	6	N		67	N	0.94	82.3
68	79	MALE	N	N	Y	N		1	60	Y	Y	Y	N	N	N	N	Y	N	N	N	N	S	1	23	N	N	D	N		N		72	N	0.97	203.8
69	64	MALE	N	Y	N	N	299.5	1	80	Y	Y	N	Y	N	N	N	N	N	N	N	Y	E	0	35	N	N	S	Y	7	N		55	N	1.21	110.5
70	61	FEMALE	Y	Y	N	Y	88.4	0		N	N	N	N	Y	N	N	N	Y	N	N	N	E	0	30	N	Y	D			N		34	N	0.54	202.8
71	65	MALE	N	Y	N	N	210	0		Y	N	N	N	N	N	N	Y	N	N	N	N	BO	1	20	N	N	S	Y	19	Y	8	61	N	2.64	292.5
72	71	MALE	N	N	Y	N		1	3	N	Y	N	N	N	Y	N	N	N	N	N	Y	S	1	15	N	N	D	Y	12	N		58	N	1.58	168.2
73	61	FEMALE	N	Y	N	N	84.8	0		Y	N	N	N	N	N	N	N	N	N	N	Y	E	1	25	N	N	D	Y	24	Y	11	63	N	0.04	118.6
74	75	FEMALE	N	Y	N	N	141.4	1	25	N	N	Y	N	N	N	N	N	Y	N	N	N	BO	1	22	N	N	D	N		Y	11	67	N	8.39	96.3
75	68	FEMALE	N	Y	N	Y	173.6	0		Y	N	N	N	N	Y	N	N	N	Y	N	N	E	1	34	Y	Y	D	N		Y	7	61	N	2.39	70.7
76	79	MALE	N	Y	N	Y	93.5	1	55	Y	N	N	N	N	N	Y	Y	N	N	N	N	E	1	33	N	N	D	Y	5	N		62	N	0.13	98.3
77	72	MALE	N	Y	N	N	329.1	1	47	N	N	N	N	N	N	Y	Y	N	N	N	N	E	1	17	N	N	S	Y	9	N				0.16	100.8
78	79	MALE	Y	Y	N	N	142.7	1	50	Y	N	N	N	N	N	N	Y	N	N	N	N	BO	1	44	N	N	D	Y	14	Y	9	67	N	0.72	216.3
79	58	MALE	N	Y	N	Y	230	0		Y	N	N	N	N	Y	N	N	N	Y	N	N	BO	1	35	Y	Y	D	N		Y	9	60	N	16.56	76.3
80	45	FEMALE	N	Y	N	Y	328.5	0		N	N	N	N	N	Y	N	N	N	Y	N	N	E	1	19	Y	Y	S	Y	25	Y	13	69	N	0.26	58.6
81	62	MALE	N	N	Y	N		0		Y	Y	N	N	Y	Y	N	N	N	Y	N	N	S	0	7	Y	Y	D	Y	10	N		49	Y	0.27	108.9
